# Supplementary material for: Surfactant templated biogenic nanoporous silica thermal insulation composite
Source: Royal Society of Chemistry journal article supplement (doi:10.1039/d4ta05605a), 2024-01-01
Supplement: d4ta05605a1.pdf [file d4ta05605a1.pdf]

Supporting information

**Surfactant templated biogenic nanoporous silica thermal insulation composite**

Long Zhu,<sup>a</sup> Taotao Meng,<sup>a</sup> Saurabh Khuje<sup>a</sup> and Shenqiang Ren<sup>\*a</sup>

<sup>a</sup> Department of Materials Science and Engineering, University of Maryland, College Park, MD  
20742, USA

\* [sren@umd.edu](mailto:sren@umd.edu)

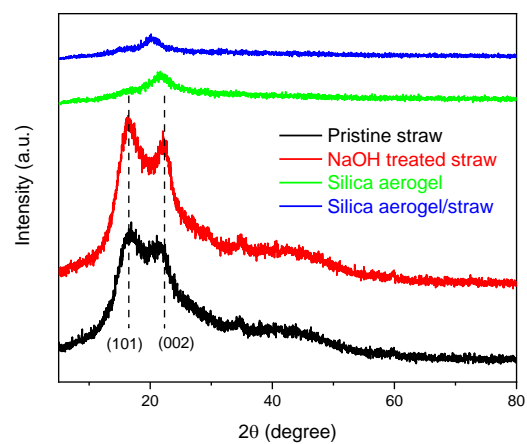

**Figure S1.** XRD spectroscopy of the pristine straw, NaOH treated straw, silica aerogel and silica aerogel/straw composite.

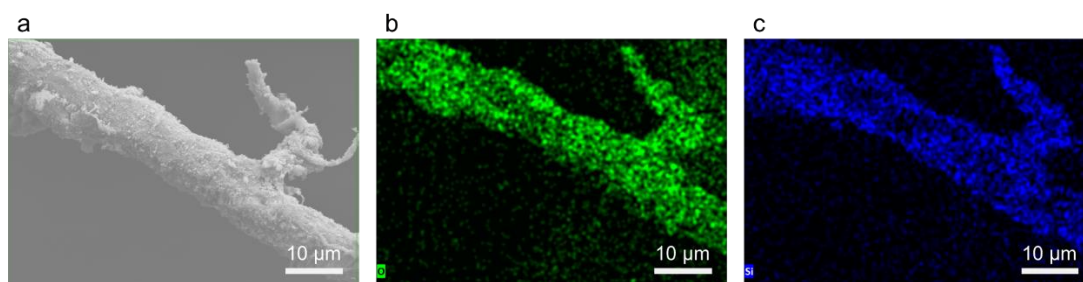

**Figure S2.** SEM image (a), EDX elemental mapping of O (b) and Si (c) of nanoporous coated straw fiber.

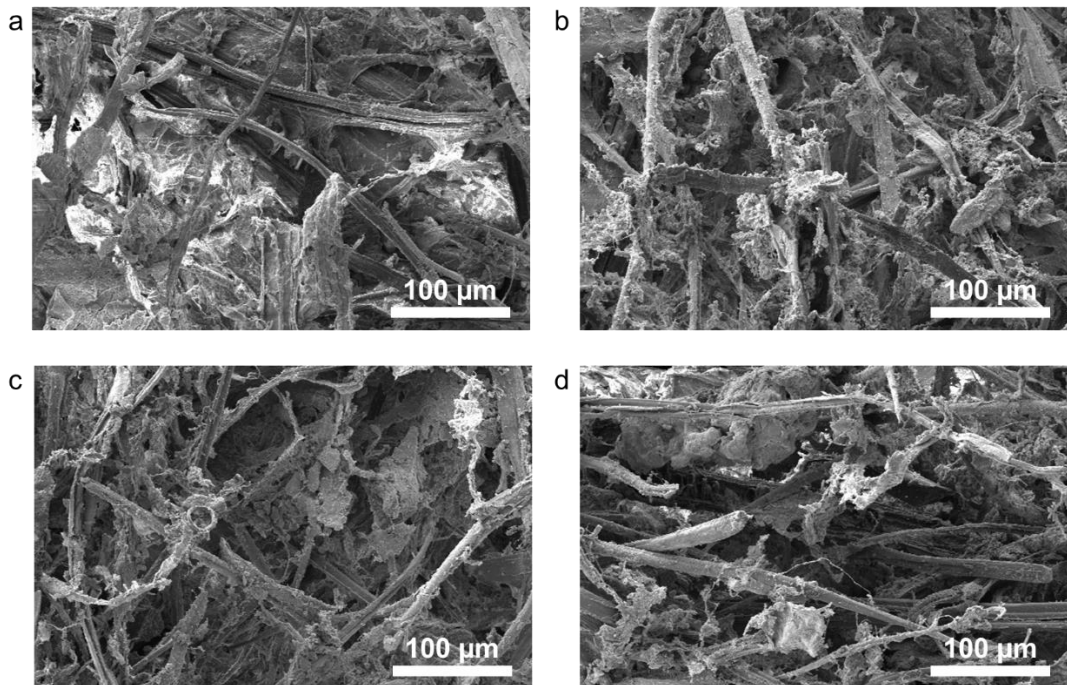

**Figure S3.** SEM images of composites with 20 wt% silica, dried using different methods: (a) water-based drying in an oven (60 °C), (b) air drying (20 °C), (c) freeze-drying (-84 °C), and (d) ethanol solvent exchange (20 °C).

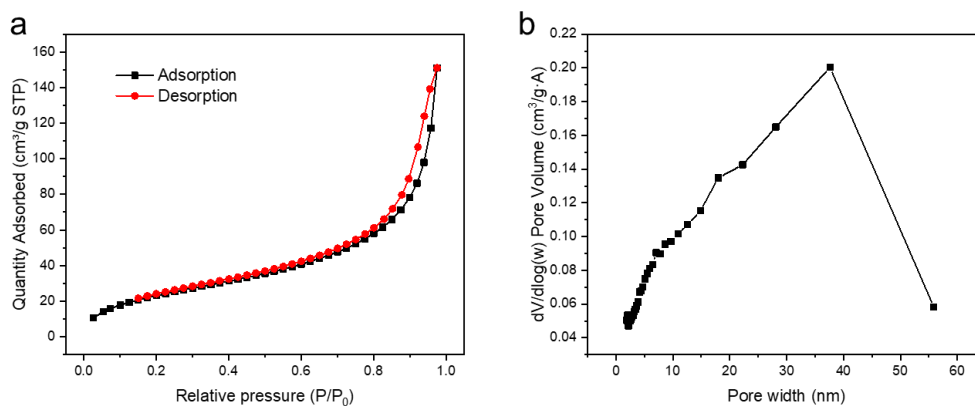

**Figure S4.** (a) Nitrogen adsorption-desorption isotherm curve of the composite with 20 wt% silica, dried using the solvent exchange method, analyzed by Brunauer-Emmett-Teller (BET) theory. (b) Pore size distribution determined by the Barrett-Joyner-Halenda (BJH) method.

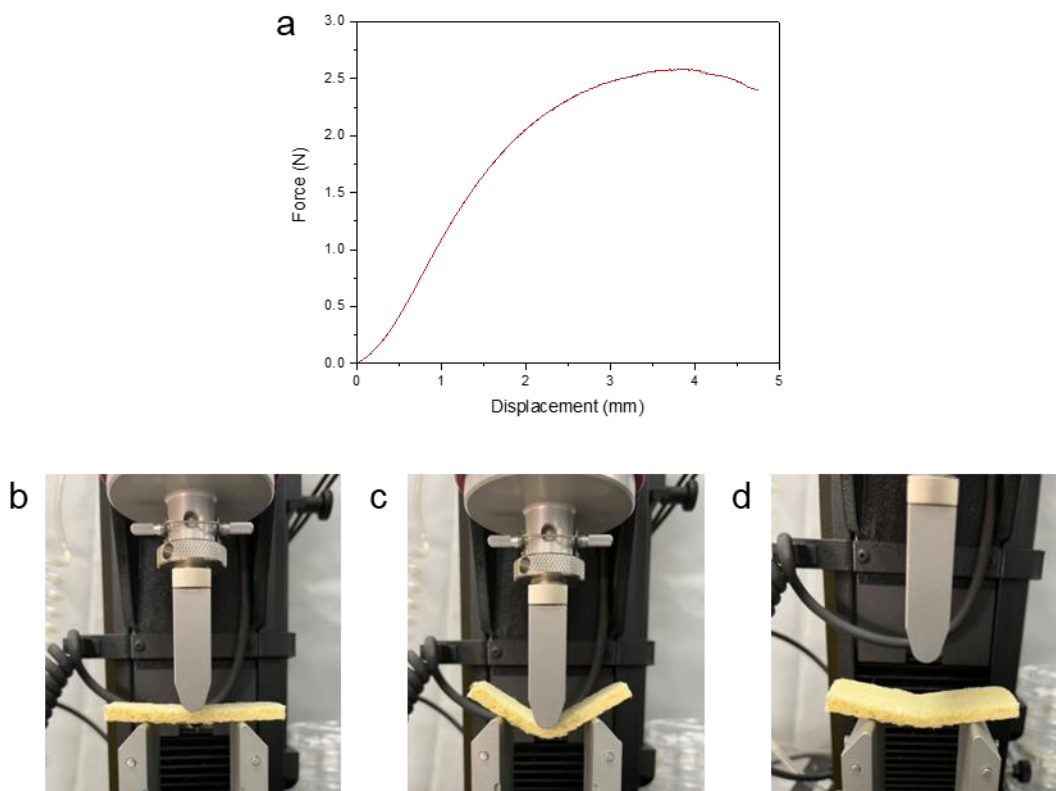

**Figure S5.** (a) Typical force-displacement curve obtained from the three-point bending test on the composite sample with 20 wt% silica, dried using the solvent exchange method. (b-d) Photographs of the samples during the three-point bending test: initial (b); loading (c); and after unloading (d).

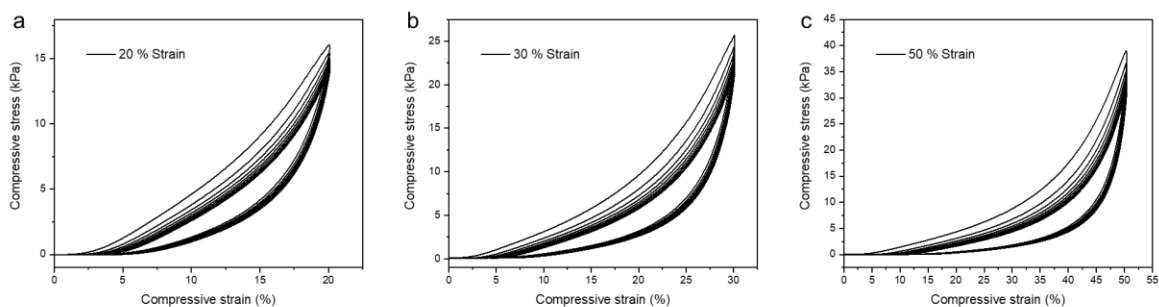

**Figure S6.** Compressive stress-compressive strain curves from the compression test on the composite with 20 wt% silica, dried using the solvent exchange method, for cyclic tests at 20% strain (a), 30% strain (b), and 50% strain (c).
